# Supplementary material for: Seasonal Variations and Resilience of Bacterial Communities in a Sewage Polluted Urban River
Source: PubMed Central journal article supplement (PMC3965440; doi:10.1371/journal.pone.0092579), 2014-03-25

**Figure S1**  
 Rarefaction analysis for pooled and individual samples of river and wastewater treatment plant at 97% cutoff level.

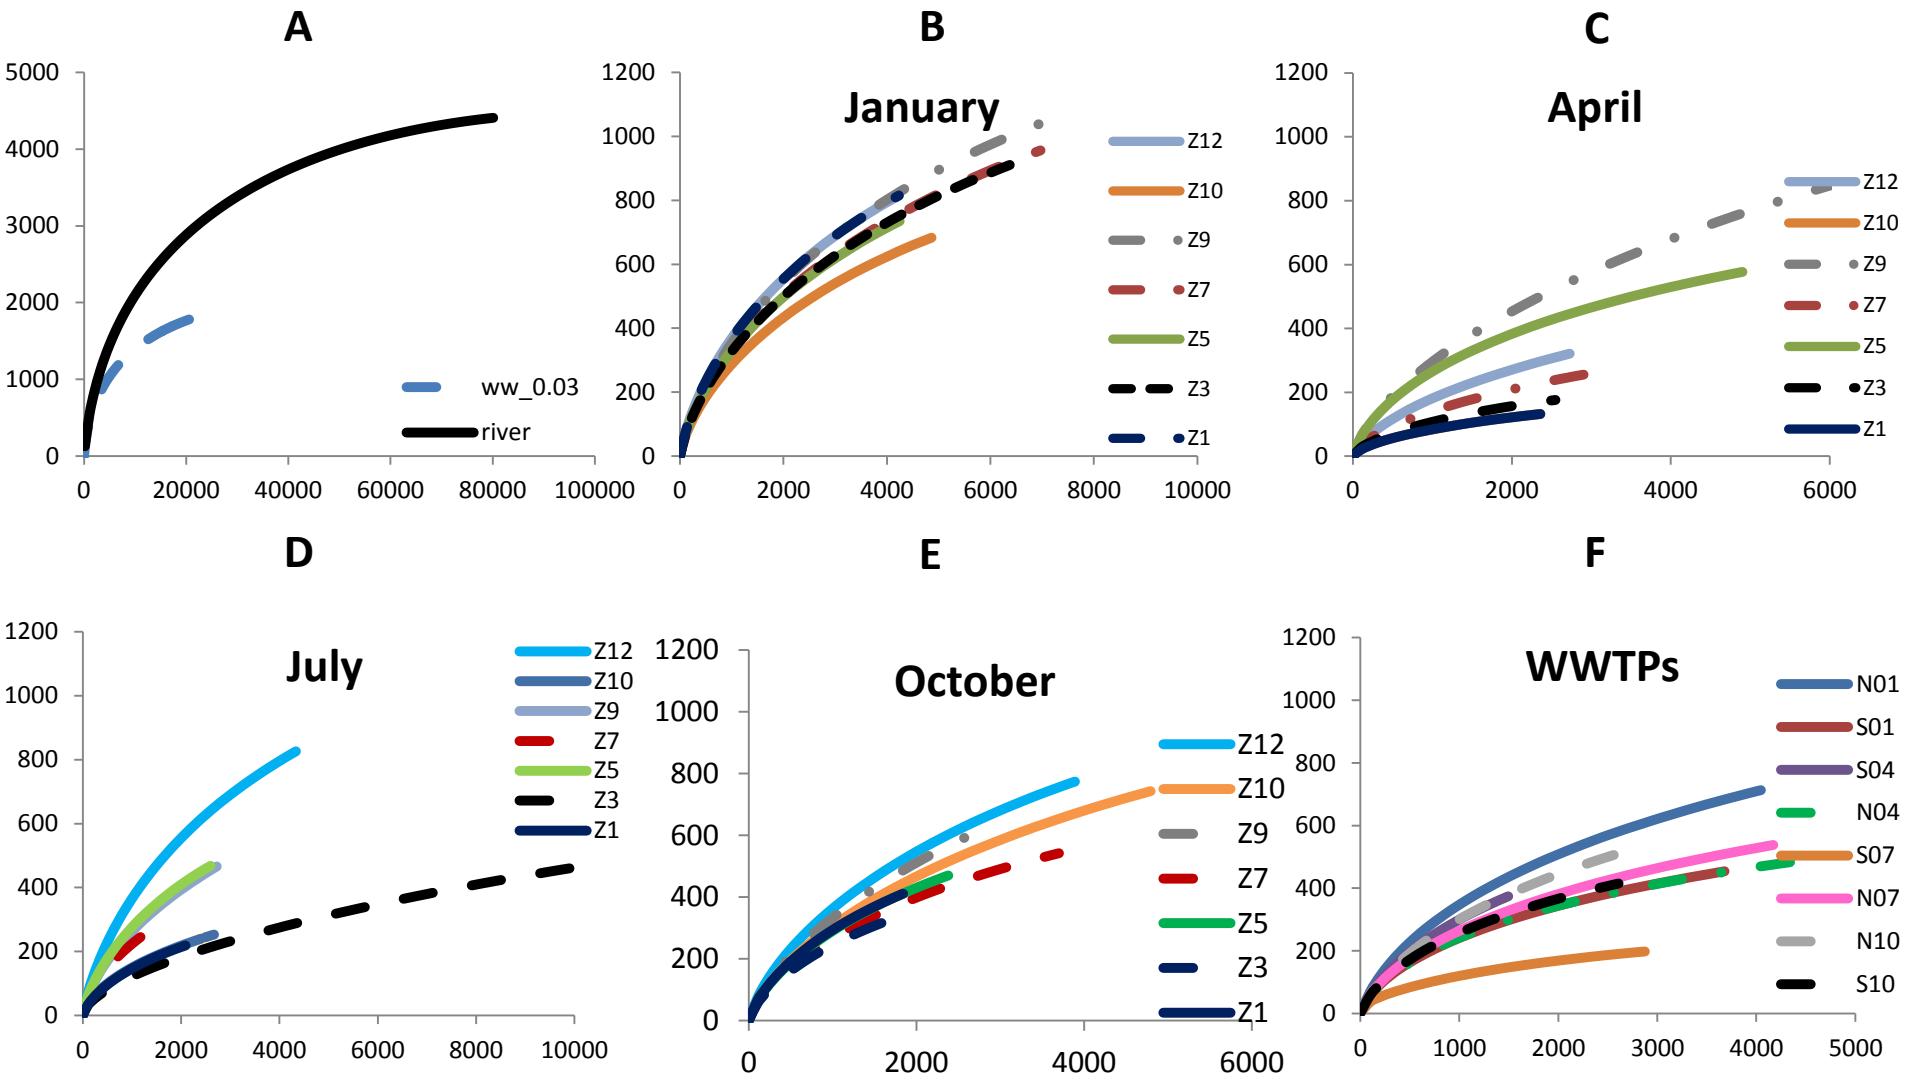

Supplement: pone.0092579.s001.pdf [file pone.0092579.s001.pdf]
