# Supplementary material for: Seasonal Variations and Resilience of Bacterial Communities in a Sewage Polluted Urban River
Source: PubMed Central journal article supplement (PMC3965440; doi:10.1371/journal.pone.0092579), 2014-03-25

**Fig S2** Longitudinal profiles of CHAO and Shannon index

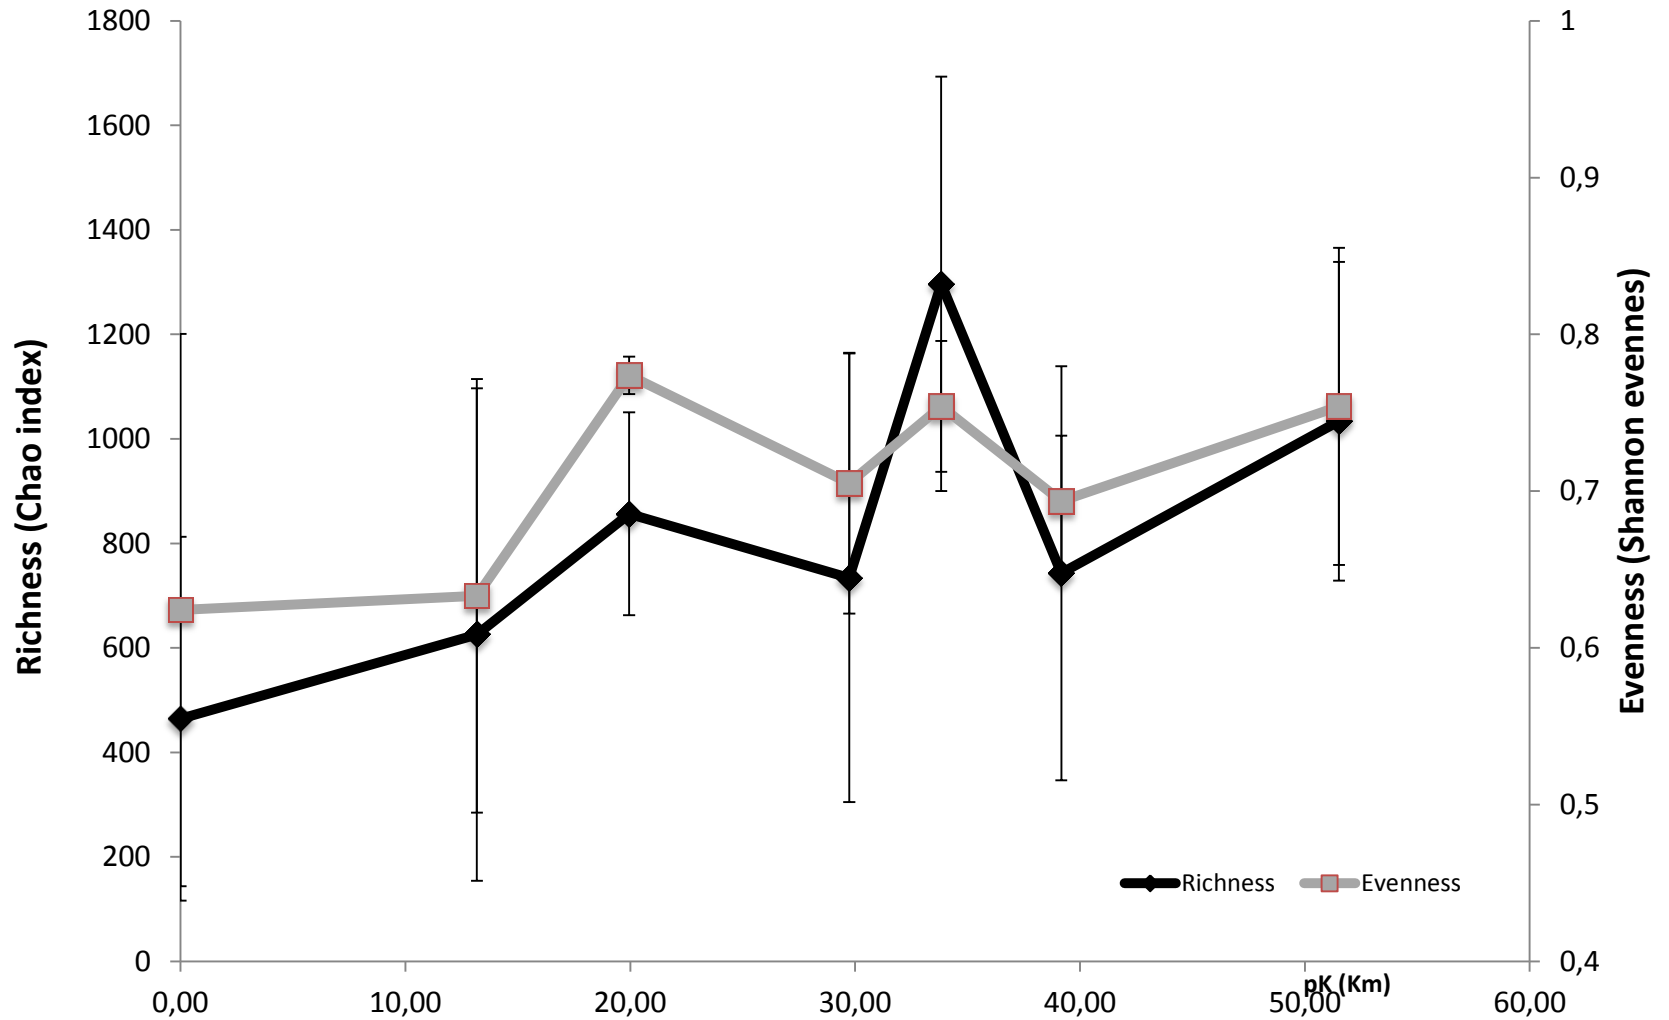

Supplement: pone.0092579.s002.pdf [file pone.0092579.s002.pdf]
