# Supplementary material for: Seasonal Variations and Resilience of Bacterial Communities in a Sewage Polluted Urban River
Source: PubMed Central journal article supplement (PMC3965440; doi:10.1371/journal.pone.0092579), 2014-03-25

**Figure S3 The community structure of bacterial genera in wastewater treatment plants** The complete linkage clustering of the samples based on the Bray-Curtis similarity metric demonstrated that, samples were grouped neither based on time nor based on wastewater treatment plant

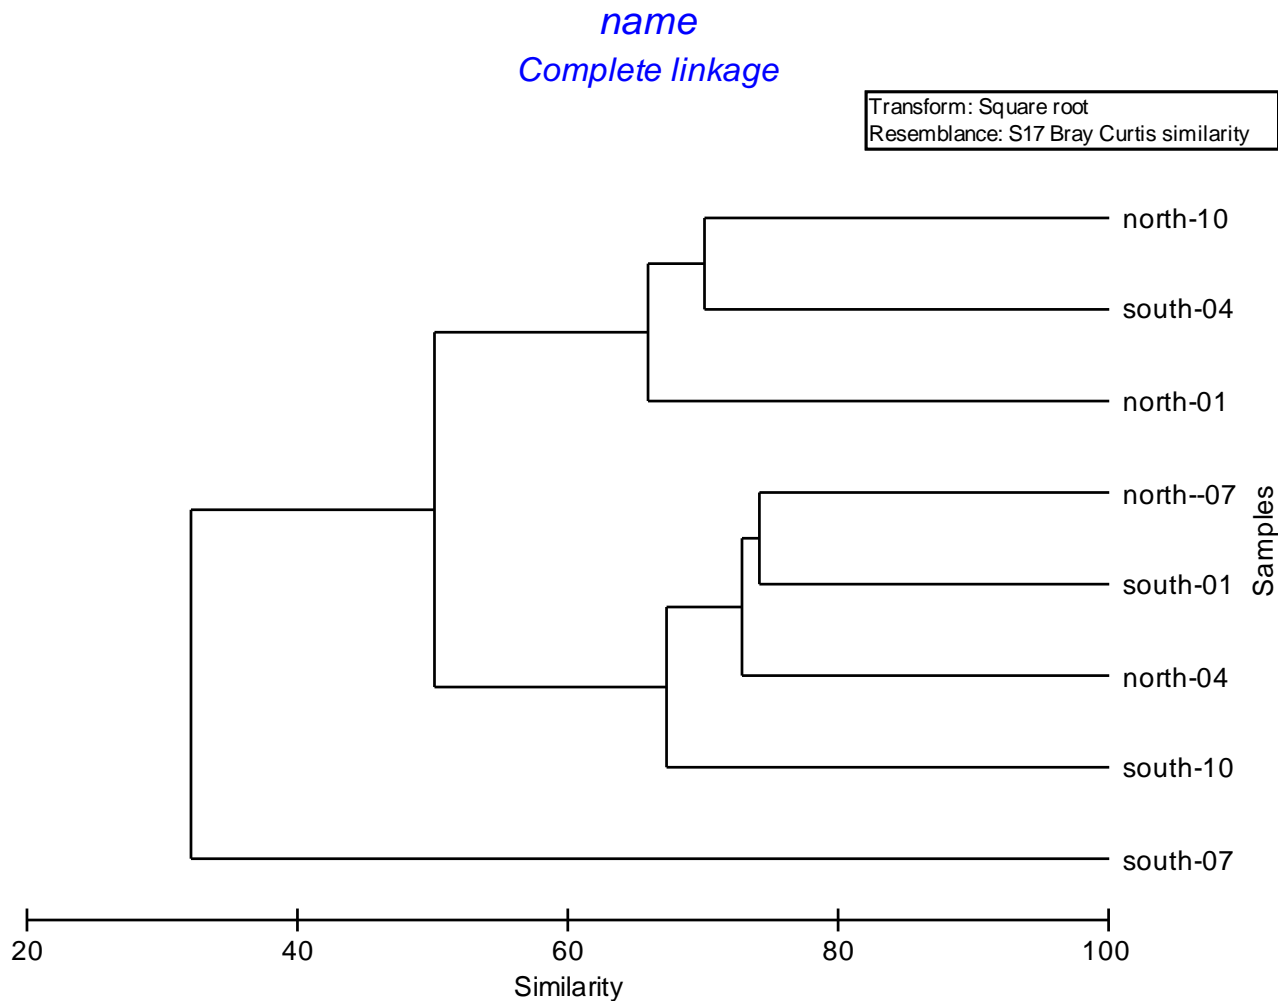

Supplement: pone.0092579.s003.pdf [file pone.0092579.s003.pdf]
